# Supplementary material for: Expression, localization, and function of P4HB in the spermatogenesis of Chinese mitten crab (Eriocheir sinensis)
Source: PeerJ. 2023 Jun 14;11:e15547. doi: 10.7717/peerj.15547 (PMC10276555; doi:10.7717/peerj.15547)
Supplement: Supplemental Information 1 [file peerj-11-15547-s001.xls]

## Sheet: Sheet1
	Average fluorescence intensity
	spermatogonia	spermatocytes	stage I spermatids	stage II spermatid	stage III spermatids	sperm
Sample No. 1	31.663	23.114	16.142	3.83	6.785	9.018
Sample No. 2	32.759	24.466	15.643	4.126	8.252	11.487
Sample No. 3	39.629	28.951	19.932	6.271	10.032	13.824
mean	34.6837	25.5103	17.239	4.74233	8.35633	11.443
standard deviation	4.3177	3.05542	2.34551	1.33211	1.62601	2.4033
Tukey's multiple comparisons test	Mean Diff.	95.00% CI of diff.	Significant?	Summary	Adjusted P Value		Significance marker
spermatogonia vs. spermatocytes	9.173	1.774 to 16.57	Yes	*	0.0129	A-B	*
spermatogonia vs. stage I spermatids	17.44	10.05 to 24.84	Yes	****	<0.0001	A-C	*
spermatogonia vs. stage II spermatid	29.94	22.54 to 37.34	Yes	****	<0.0001	A-D	*
spermatogonia vs. stage III spermatids	26.33	18.93 to 33.73	Yes	****	<0.0001	A-E	*
spermatogonia vs. sperm	23.24	15.84 to 30.64	Yes	****	<0.0001	A-F	*
spermatocytes vs. stage I spermatids	8.271	0.8721 to 15.67	Yes	*	0.0257	B-C	#
spermatocytes vs. stage II spermatid	20.77	13.37 to 28.17	Yes	****	<0.0001	B-D	#
spermatocytes vs. stage III spermatids	17.15	9.755 to 24.55	Yes	****	<0.0001	B-E	#
spermatocytes vs. sperm	14.07	6.668 to 21.47	Yes	***	0.0004	B-F	#
stage I spermatids vs. stage II spermatid	12.5	5.097 to 19.90	Yes	**	0.0011	C-D	&
stage I spermatids vs. stage III spermatids	8.883	1.483 to 16.28	Yes	*	0.0161	C-E	&
stage I spermatids vs. sperm	5.796	-1.603 to 13.20	No	ns	0.1627	C-F	No mark
stage II spermatid vs. stage III spermatids	-3.614	-11.01 to 3.785	No	ns	0.5901	D-E	No mark
stage II spermatid vs. sperm	-6.701	-14.10 to 0.6986	No	ns	0.0846	D-F	No mark
stage III spermatids vs. sperm	-3.087	-10.49 to 4.313	No	ns	0.7261	E-F	No mark
	Marking symbol
Compared with spermatogonia	*
Compared with spermatocytes	#
Compared with stage I spermatids	&
Compared with stage II spermatids	△
Compared with stage III spermatids	§
Compared with sperm	◮
